# Supplementary material for: Returning to Leisure Activity Post-Stroke: Barriers and Facilitators to Engagement
Source: MDPI journal article supplement (doi:10.3390/ijerph192114587), 2022-11-07
Supplement: s1 [file s1]

**Supplementary Information S1. Number of participant characteristics identified within the ‘barrier’ themes as a proportion (%) of the total participant characteristics identified for responses to the ‘made it more difficult’ question**

| Participant characteristics                   | Physical difficulties (n=717) |      | Energy Levels (n=179) |      | Losing in-dependence (n=111) |      | Mental health difficulties (n=109) |      | Hidden Disability (n=69) |      | Delay or lack of healthcare provision (n=31) |      | ‘made it more difficult’ response total (n=1045) |
|-----------------------------------------------|-------------------------------|------|-----------------------|------|------------------------------|------|------------------------------------|------|--------------------------|------|----------------------------------------------|------|--------------------------------------------------|
| Event                                         |                               |      |                       |      |                              |      |                                    |      |                          |      |                                              |      |                                                  |
| Stroke                                        | 612                           | (70) | 149                   | (17) | 101                          | (12) | 89                                 | (10) | 55                       | (6)  | 26                                           | (3)  | 872                                              |
| TIA                                           | 105                           | (61) | 30                    | (17) | 10                           | (6)  | 20                                 | (12) | 14                       | (8)  | 5                                            | (3)  | 173                                              |
| Age                                           |                               |      |                       |      |                              |      |                                    |      |                          |      |                                              |      |                                                  |
| ≤49                                           | 39                            | (59) | 16                    | (24) | 4                            | (6)  | 12                                 | (18) | 5                        | (8)  | 1                                            | (2)  | 66                                               |
| 50-69                                         | 207                           | (66) | 67                    | (21) | 30                           | (10) | 44                                 | (14) | 22                       | (7)  | 13                                           | (4)  | 315                                              |
| ≥70                                           | 471                           | (71) | 96                    | (15) | 77                           | (12) | 53                                 | (8)  | 42                       | (6)  | 17                                           | (3)  | 664                                              |
| Sex                                           |                               |      |                       |      |                              |      |                                    |      |                          |      |                                              |      |                                                  |
| Female                                        | 322                           | (68) | 88                    | (19) | 57                           | (12) | 60                                 | (13) | 40                       | (8)  | 12                                           | (3)  | 476                                              |
| Male                                          | 395                           | (69) | 91                    | (16) | 54                           | (10) | 49                                 | (9)  | 29                       | (5)  | 19                                           | (3)  | 569                                              |
| Ethnicity                                     |                               |      |                       |      |                              |      |                                    |      |                          |      |                                              |      |                                                  |
| White                                         | 696                           | (69) | 173                   | (17) | 107                          | (11) | 108                                | (11) | 66                       | (7)  | 30                                           | (3)  | 1013                                             |
| Asian                                         | 9                             | (56) | 3                     | (19) | 1                            | (6)  | 1                                  | (6)  | 1                        | (6)  | 0                                            | (0)  | 16                                               |
| Black                                         | 4                             | (67) | 2                     | (33) | 1                            | (17) | 0                                  | (0)  | 1                        | (17) | 0                                            | (0)  | 6                                                |
| Mixed                                         | 3                             | (75) | 1                     | (25) | 0                            | (0)  | 0                                  | (0)  | 0                        | (0)  | 1                                            | (25) | 4                                                |
| Other                                         | 5                             | (83) | 0                     | (0)  | 2                            | (33) | 0                                  | (0)  | 1                        | (17) | 0                                            | (0)  | 6                                                |
| Socio-economic status (quintiles)             |                               |      |                       |      |                              |      |                                    |      |                          |      |                                              |      |                                                  |
| 1st (Most deprived)                           | 114                           | (71) | 28                    | (18) | 12                           | (8)  | 17                                 | (11) | 9                        | (6)  | 2                                            | (1)  | 160                                              |
| 2nd                                           | 126                           | (68) | 34                    | (18) | 19                           | (10) | 24                                 | (13) | 14                       | (8)  | 4                                            | (2)  | 186                                              |
| 3rd                                           | 174                           | (74) | 41                    | (18) | 17                           | (7)  | 24                                 | (10) | 12                       | (5)  | 9                                            | (4)  | 234                                              |
| 4th                                           | 132                           | (63) | 39                    | (19) | 29                           | (14) | 19                                 | (9)  | 13                       | (6)  | 9                                            | (4)  | 210                                              |
| 5th (Least deprived)                          | 171                           | (67) | 37                    | (15) | 34                           | (13) | 25                                 | (10) | 21                       | (8)  | 7                                            | (3)  | 255                                              |
| Modified Rankin Score 6M                      |                               |      |                       |      |                              |      |                                    |      |                          |      |                                              |      |                                                  |
| 0-1 (no symptoms-no significant difficulties) | 264                           | (58) | 101                   | (22) | 51                           | (11) | 58                                 | (13) | 27                       | (6)  | 10                                           | (2)  | 456                                              |
| 2-3 (slight-moderate disability)              | 319                           | (75) | 66                    | (16) | 45                           | (11) | 38                                 | (9)  | 32                       | (8)  | 6                                            | (1)  | 423                                              |

|                                         |     |       |     |      |     |      |     |      |    |      |    |      |     |
|-----------------------------------------|-----|-------|-----|------|-----|------|-----|------|----|------|----|------|-----|
| 4-5 (moderate severe-severe disability) | 119 | (81)  | 12  | (8)  | 12  | (8)  | 12  | (8)  | 10 | (7)  | 15 | (10) | 147 |
| Unknown                                 | 15  | (79)  | 0   | (0)  | 3   | (16) | 1   | (5)  | 0  | (0)  | 0  | (0)  | 19  |
| <b>Living with</b>                      |     |       |     |      |     |      |     |      |    |      |    |      |     |
| Alone                                   | 214 | (67)  | 48  | (15) | 38  | (12) | 33  | (10) | 22 | (7)  | 7  | (2)  | 321 |
| Partner                                 | 412 | (69)  | 110 | (18) | 65  | (11) | 65  | (11) | 36 | (6)  | 18 | (3)  | 599 |
| Relative/friend                         | 51  | (65)  | 18  | (23) | 6   | (8)  | 11  | (14) | 8  | (10) | 2  | (3)  | 79  |
| In care/hospital                        | 33  | (85)  | 3   | (8)  | 2   | (5)  | 0   | (0)  | 3  | (8)  | 4  | (10) | 39  |
| Unknown                                 | 7   | (100) | 0   | (0)  | 0   | (0)  | 0   | (0)  | 0  | (0)  | 0  | (0)  | 7   |
| <b>Getting out and about</b>            |     |       |     |      |     |      |     |      |    |      |    |      |     |
| In their own car                        | 238 | (65)  | 93  | (26) | 22  | (6)  | 47  | (13) | 19 | (5)  | 12 | (3)  | 365 |
| Public Transport/Taxi                   | 145 | (64)  | 32  | (14) | 35  | (16) | 18  | (8)  | 13 | (6)  | 6  | (3)  | 226 |
| Relative/friend                         | 278 | (75)  | 44  | (12) | 43  | (12) | 41  | (11) | 32 | (9)  | 6  | (2)  | 371 |
| Walk or bike                            | 12  | (57)  | 3   | (14) | 5   | (24) | 2   | (10) | 2  | (10) | 1  | (5)  | 21  |
| Other                                   | 44  | (71)  | 7   | (11) | 6   | (10) | 1   | (2)  | 3  | (5)  | 6  | (10) | 62  |
| <b>Living situation</b>                 |     |       |     |      |     |      |     |      |    |      |    |      |     |
| Own home                                | 632 | (68)  | 164 | (18) | 105 | (11) | 100 | (11) | 59 | (6)  | 25 | (3)  | 937 |
| Relative's home                         | 25  | (69)  | 7   | (19) | 3   | (8)  | 5   | (14) | 4  | (11) | 1  | (3)  | 36  |
| Care-home                               | 29  | (91)  | 2   | (6)  | 2   | (6)  | 0   | (0)  | 4  | (13) | 5  | (16) | 32  |
| Supported living                        | 16  | (84)  | 4   | (21) | 1   | (5)  | 4   | (21) | 2  | (11) | 0  | (0)  | 19  |
| Other                                   | 15  | (71)  | 2   | (10) | 0   | (0)  | 0   | (0)  | 0  | (0)  | 0  | (0)  | 21  |
| <b>Employment</b>                       |     |       |     |      |     |      |     |      |    |      |    |      |     |
| Full-time                               | 50  | (60)  | 18  | (21) | 4   | (5)  | 18  | (21) | 5  | (6)  | 4  | (5)  | 84  |
| Part-time                               | 31  | (66)  | 12  | (26) | 6   | (13) | 8   | (17) | 4  | (9)  | 0  | (0)  | 47  |
| Retired/Semi-retired                    | 538 | (70)  | 119 | (16) | 86  | (11) | 62  | (8)  | 51 | (7)  | 18 | (2)  | 770 |
| Seeking employment                      | 3   | (30)  | 5   | (50) | 0   | (0)  | 3   | (30) | 0  | (0)  | 1  | (10) | 10  |
| Unable to work                          | 87  | (71)  | 24  | (20) | 13  | (11) | 17  | (14) | 8  | (7)  | 6  | (5)  | 122 |
| Other                                   | 8   | (67)  | 1   | (8)  | 2   | (17) | 1   | (8)  | 1  | (8)  | 2  | (17) | 12  |
| <b>Post-stroke fatigue</b>              |     |       |     |      |     |      |     |      |    |      |    |      |     |
| Yes                                     | 637 | (69)  | 174 | (19) | 95  | (10) | 103 | (11) | 67 | (7)  | 26 | (3)  | 925 |
| No                                      | 63  | (65)  | 3   | (3)  | 15  | (16) | 5   | (5)  | 2  | (2)  | 4  | (4)  | 97  |
| Unknown                                 | 17  | (74)  | 2   | (9)  | 1   | (4)  | 1   | (4)  | 0  | (0)  | 1  | (4)  | 23  |
| <b>Post-stroke depression</b>           |     |       |     |      |     |      |     |      |    |      |    |      |     |
| Yes                                     | 410 | (71)  | 96  | (17) | 64  | (11) | 74  | (13) | 51 | (9)  | 21 | (4)  | 575 |
| No                                      | 280 | (65)  | 77  | (18) | 45  | (10) | 34  | (8)  | 18 | (4)  | 8  | (2)  | 434 |

|                                        |     |      |     |      |    |      |    |      |    |      |    |     |     |
|----------------------------------------|-----|------|-----|------|----|------|----|------|----|------|----|-----|-----|
| Unknown                                | 27  | (75) | 6   | (17) | 2  | (6)  | 1  | (3)  | 0  | (0)  | 2  | (6) | 36  |
| <b>Post ADL help</b>                   |     |      |     |      |    |      |    |      |    |      |    |     |     |
| Yes                                    | 334 | (76) | 48  | (11) | 45 | (10) | 38 | (9)  | 34 | (8)  | 19 | (4) | 438 |
| No                                     | 377 | (63) | 129 | (22) | 65 | (11) | 70 | (12) | 34 | (6)  | 12 | (2) | 599 |
| Unknown                                | 6   | (75) | 2   | (25) | 1  | (13) | 1  | (13) | 1  | (13) | 0  | (0) | 8   |
| <b>Post-event important activities</b> |     |      |     |      |    |      |    |      |    |      |    |     |     |
| Craft, skills, hobby                   | 75  | (71) | 17  | (16) | 10 | (10) | 10 | (10) | 9  | (9)  | 2  | (2) | 105 |
| Every day                              | 336 | (69) | 89  | (18) | 50 | (10) | 56 | (11) | 30 | (6)  | 20 | (4) | 490 |
| Fitness and exercise                   | 250 | (62) | 88  | (22) | 46 | (11) | 56 | (14) | 30 | (8)  | 14 | (4) | 402 |
| Social Group/socialising               | 173 | (68) | 47  | (19) | 39 | (15) | 31 | (12) | 15 | (6)  | 9  | (4) | 254 |
| <b>Post-event visual impairment</b>    |     |      |     |      |    |      |    |      |    |      |    |     |     |
| Yes                                    | 202 | (67) | 43  | (14) | 38 | (13) | 35 | (12) | 34 | (11) | 11 | (4) | 301 |
| No                                     | 423 | (68) | 126 | (20) | 66 | (11) | 62 | (10) | 28 | (5)  | 18 | (3) | 623 |
| Unknown                                | 92  | (76) | 10  | (8)  | 7  | (6)  | 12 | (10) | 7  | (6)  | 2  | (2) | 121 |
| <b>Post-event hearing impairment</b>   |     |      |     |      |    |      |    |      |    |      |    |     |     |
| Yes                                    | 189 | (68) | 45  | (16) | 25 | (9)  | 27 | (10) | 27 | (10) | 7  | (3) | 279 |
| No                                     | 437 | (68) | 119 | (19) | 75 | (12) | 66 | (10) | 34 | (5)  | 20 | (3) | 639 |
| Unknown                                | 91  | (72) | 15  | (12) | 11 | (9)  | 16 | (13) | 8  | (6)  | 4  | (3) | 127 |
| <b>Post-event speech impairment</b>    |     |      |     |      |    |      |    |      |    |      |    |     |     |
| Yes                                    | 156 | (72) | 35  | (16) | 26 | (12) | 28 | (13) | 25 | (12) | 12 | (6) | 218 |
| No                                     | 461 | (68) | 124 | (18) | 71 | (10) | 72 | (11) | 36 | (5)  | 18 | (3) | 680 |
| Unknown                                | 100 | (68) | 20  | (14) | 14 | (10) | 9  | (6)  | 8  | (5)  | 1  | (1) | 147 |

**Supplementary Information S2. Number of participant characteristics identified within the ‘facilitator’ themes as a proportion (%) of the total participant characteristics identified for responses to the ‘helped’ question**

| Participant characteristics                   | Family Support<br>(n=286) |      | Healthcare<br>Support (n=221) |      | Well-being &<br>fitness (n=183) |      | Friend Support<br>(n=164) |      | Self-<br>management<br>(n=152) |      | Returning to<br>normality<br>(n=70) |      | 'helped'<br>response total<br>(n=820) |
|-----------------------------------------------|---------------------------|------|-------------------------------|------|---------------------------------|------|---------------------------|------|--------------------------------|------|-------------------------------------|------|---------------------------------------|
| Event                                         |                           |      |                               |      |                                 |      |                           |      |                                |      |                                     |      |                                       |
| Stroke                                        | 234                       | (35) | 201                           | (30) | 149                             | (22) | 135                       | (20) | 127                            | (19) | 55                                  | (8)  | 673                                   |
| TIA                                           | 52                        | (35) | 20                            | (14) | 34                              | (23) | 29                        | (20) | 25                             | (17) | 15                                  | (10) | 147                                   |
| Age                                           |                           |      |                               |      |                                 |      |                           |      |                                |      |                                     |      |                                       |
| ≤49                                           | 19                        | (40) | 10                            | (21) | 11                              | (23) | 18                        | (38) | 11                             | (23) | 7                                   | (15) | 47                                    |
| 50-69                                         | 85                        | (36) | 75                            | (32) | 59                              | (25) | 39                        | (16) | 49                             | (21) | 24                                  | (10) | 238                                   |
| ≥70                                           | 182                       | (34) | 136                           | (25) | 113                             | (21) | 107                       | (20) | 92                             | (17) | 39                                  | (7)  | 535                                   |
| Sex                                           |                           |      |                               |      |                                 |      |                           |      |                                |      |                                     |      |                                       |
| Male                                          | 153                       | (32) | 137                           | (29) | 122                             | (26) | 74                        | (16) | 71                             | (15) | 40                                  | (8)  | 474                                   |
| Female                                        | 133                       | (38) | 84                            | (24) | 61                              | (18) | 90                        | (26) | 81                             | (23) | 30                                  | (9)  | 346                                   |
| Ethnicity                                     |                           |      |                               |      |                                 |      |                           |      |                                |      |                                     |      |                                       |
| White                                         | 279                       | (35) | 214                           | (27) | 177                             | (22) | 161                       | (20) | 149                            | (19) | 68                                  | (9)  | 794                                   |
| Asian                                         | 2                         | (20) | 1                             | (10) | 1                               | (10) | 0                         | (0)  | 2                              | (20) | 1                                   | (10) | 10                                    |
| Black                                         | 2                         | (25) | 3                             | (38) | 3                               | (38) | 1                         | (13) | 1                              | (13) | 1                                   | (13) | 8                                     |
| Mixed                                         | 1                         | (50) | 1                             | (50) | 1                               | (50) | 1                         | (50) | 0                              | (0)  | 0                                   | (0)  | 2                                     |
| Other                                         | 2                         | (33) | 2                             | (33) | 1                               | (17) | 1                         | (17) | 0                              | (0)  | 0                                   | (0)  | 6                                     |
| Socio-economic status<br>(quintiles)          |                           |      |                               |      |                                 |      |                           |      |                                |      |                                     |      |                                       |
| 1st (Most deprived)                           | 34                        | (34) | 27                            | (27) | 30                              | (30) | 23                        | (23) | 18                             | (18) | 9                                   | (9)  | 99                                    |
| 2nd                                           | 47                        | (32) | 34                            | (23) | 31                              | (21) | 27                        | (18) | 30                             | (20) | 8                                   | (5)  | 147                                   |
| 3rd                                           | 63                        | (37) | 48                            | (28) | 34                              | (20) | 34                        | (20) | 30                             | (18) | 20                                  | (12) | 171                                   |
| 4th                                           | 76                        | (37) | 52                            | (26) | 47                              | (23) | 34                        | (17) | 32                             | (16) | 15                                  | (7)  | 203                                   |
| 5th (Least deprived)                          | 66                        | (33) | 60                            | (30) | 41                              | (21) | 46                        | (23) | 42                             | (21) | 18                                  | (9)  | 200                                   |
| Modified Rankin Score (6M)                    |                           |      |                               |      |                                 |      |                           |      |                                |      |                                     |      |                                       |
| 0-1 (no symptoms-no significant difficulties) | 176                       | (34) | 107                           | (21) | 124                             | (24) | 111                       | (22) | 110                            | (21) | 53                                  | (10) | 515                                   |

|                                                  |     |      |     |      |     |      |     |      |     |      |    |      |     |
|--------------------------------------------------|-----|------|-----|------|-----|------|-----|------|-----|------|----|------|-----|
| 2-3 ( <i>slight-moderate disability</i> )        | 80  | (34) | 81  | (34) | 47  | (20) | 43  | (18) | 39  | (16) | 15 | (6)  | 239 |
| 4-5 ( <i>moderate severe-severe disability</i> ) | 29  | (49) | 31  | (53) | 10  | (17) | 9   | (15) | 2   | (3)  | 2  | (3)  | 59  |
| Unknown                                          | 1   | (14) | 2   | (29) | 2   | (29) | 1   | (14) | 1   | (14) | 0  | (0)  | 7   |
| <b>Living with</b>                               |     |      |     |      |     |      |     |      |     |      |    |      |     |
| Alone                                            | 72  | (30) | 52  | (22) | 45  | (19) | 68  | (29) | 48  | (20) | 17 | (7)  | 239 |
| Partner                                          | 182 | (37) | 146 | (29) | 127 | (26) | 74  | (15) | 87  | (18) | 47 | (9)  | 498 |
| Relative/Friend                                  | 29  | (41) | 16  | (23) | 10  | (14) | 19  | (27) | 17  | (24) | 6  | (9)  | 71  |
| In care/hospital                                 | 2   | (22) | 6   | (67) | 0   | (0)  | 2   | (22) | 0   | (0)  | 0  | (0)  | 9   |
| Unknown                                          | 1   | (33) | 1   | (33) | 1   | (33) | 1   | (33) | 0   | (0)  | 0  | (0)  | 3   |
| <b>Getting out and about</b>                     |     |      |     |      |     |      |     |      |     |      |    |      |     |
| Own car                                          | 112 | (29) | 88  | (23) | 104 | (27) | 76  | (19) | 90  | (23) | 39 | (10) | 392 |
| Relative/Friend                                  | 109 | (48) | 77  | (34) | 43  | (19) | 44  | (20) | 23  | (10) | 14 | (6)  | 225 |
| Public Transport/Taxi                            | 56  | (34) | 43  | (26) | 30  | (18) | 39  | (24) | 33  | (20) | 15 | (9)  | 165 |
| Walk/Bike                                        | 4   | (21) | 5   | (26) | 3   | (16) | 3   | (16) | 3   | (16) | 2  | (11) | 19  |
| Care home/community                              | 0   | (0)  | 3   | (75) | 1   | (25) | 0   | (0)  | 0   | (0)  | 0  | (0)  | 4   |
| Unable                                           | 3   | (50) | 1   | (17) | 0   | (0)  | 0   | (0)  | 1   | (17) | 0  | (0)  | 6   |
| Unknown                                          | 2   | (22) | 4   | (44) | 2   | (22) | 2   | (22) | 2   | (22) | 0  | (0)  | 9   |
| <b>Living situation</b>                          |     |      |     |      |     |      |     |      |     |      |    |      |     |
| Own home                                         | 266 | (35) | 206 | (27) | 177 | (23) | 150 | (20) | 145 | (19) | 66 | (9)  | 770 |
| Relative's home                                  | 15  | (60) | 5   | (20) | 4   | (16) | 9   | (36) | 3   | (12) | 4  | (16) | 25  |
| Care-home                                        | 0   | (0)  | 5   | (63) | 0   | (0)  | 0   | (0)  | 0   | (0)  | 0  | (0)  | 8   |
| Supported living                                 | 3   | (30) | 3   | (30) | 0   | (0)  | 2   | (20) | 3   | (30) | 0  | (0)  | 10  |
| Other                                            | 2   | (29) | 2   | (29) | 2   | (29) | 3   | (43) | 1   | (14) | 0  | (0)  | 7   |
| <b>Employment</b>                                |     |      |     |      |     |      |     |      |     |      |    |      |     |
| Full-time                                        | 34  | (37) | 25  | (27) | 21  | (23) | 25  | (27) | 22  | (24) | 13 | (14) | 92  |
| Part-time                                        | 16  | (31) | 19  | (37) | 13  | (26) | 12  | (24) | 10  | (20) | 6  | (12) | 51  |
| Retired/Semi-Retired                             | 209 | (34) | 151 | (25) | 134 | (22) | 115 | (19) | 111 | (18) | 48 | (8)  | 613 |
| Seeking employment                               | 2   | (40) | 2   | (40) | 2   | (40) | 1   | (20) | 1   | (20) | 1  | (20) | 5   |
| Unable to work                                   | 21  | (43) | 20  | (41) | 12  | (25) | 9   | (18) | 6   | (12) | 2  | (4)  | 49  |
| Other                                            | 4   | (40) | 4   | (40) | 1   | (10) | 2   | (20) | 2   | (20) | 0  | (0)  | 10  |

|                                        |     |      |     |      |     |      |     |      |     |      |    |      |     |
|----------------------------------------|-----|------|-----|------|-----|------|-----|------|-----|------|----|------|-----|
| <b>Post-stroke fatigue</b>             |     |      |     |      |     |      |     |      |     |      |    |      |     |
| Yes                                    | 246 | (36) | 189 | (28) | 142 | (21) | 142 | (21) | 125 | (19) | 52 | (8)  | 676 |
| No                                     | 36  | (29) | 25  | (20) | 39  | (32) | 20  | (16) | 25  | (20) | 15 | (12) | 123 |
| Unknown                                | 4   | (19) | 7   | (33) | 2   | (10) | 2   | (10) | 2   | (10) | 3  | (14) | 21  |
| <b>Post-stroke depression</b>          |     |      |     |      |     |      |     |      |     |      |    |      |     |
| Yes                                    | 119 | (36) | 92  | (28) | 61  | (19) | 69  | (21) | 56  | (17) | 16 | (5)  | 327 |
| No                                     | 158 | (34) | 121 | (26) | 118 | (25) | 90  | (19) | 93  | (20) | 50 | (11) | 467 |
| Unknown                                | 9   | (35) | 8   | (31) | 4   | (15) | 5   | (19) | 3   | (12) | 4  | (15) | 26  |
| <b>Post ADL Help</b>                   |     |      |     |      |     |      |     |      |     |      |    |      |     |
| Yes                                    | 106 | (41) | 90  | (35) | 46  | (18) | 47  | (18) | 26  | (10) | 13 | (5)  | 257 |
| No                                     | 178 | (32) | 129 | (23) | 136 | (24) | 116 | (21) | 125 | (22) | 57 | (10) | 558 |
| Unknown                                | 2   | (40) | 2   | (40) | 1   | (20) | 1   | (20) | 1   | (20) | 0  | (0)  | 5   |
| <b>Post-event important activities</b> |     |      |     |      |     |      |     |      |     |      |    |      |     |
| Craft and hobby                        | 35  | (34) | 23  | (22) | 27  | (26) | 37  | (36) | 20  | (19) | 14 | (14) | 104 |
| Everyday                               | 181 | (46) | 128 | (33) | 83  | (21) | 96  | (25) | 82  | (21) | 44 | (11) | 390 |
| Fitness and well-being                 | 124 | (36) | 102 | (30) | 105 | (31) | 79  | (23) | 79  | (23) | 36 | (11) | 343 |
| Social activities                      | 92  | (42) | 71  | (32) | 39  | (18) | 67  | (31) | 55  | (25) | 20 | (9)  | 219 |
| <b>Post-event visual impairment</b>    |     |      |     |      |     |      |     |      |     |      |    |      |     |
| Yes                                    | 72  | (44) | 54  | (33) | 37  | (23) | 30  | (18) | 34  | (21) | 11 | (7)  | 163 |
| No                                     | 190 | (33) | 144 | (25) | 134 | (23) | 121 | (21) | 105 | (18) | 54 | (9)  | 577 |
| Unknown                                | 24  | (30) | 23  | (29) | 12  | (15) | 13  | (16) | 13  | (16) | 5  | (6)  | 80  |
| <b>Post-event hearing impairment</b>   |     |      |     |      |     |      |     |      |     |      |    |      |     |
| Yes                                    | 70  | (39) | 52  | (29) | 34  | (19) | 30  | (17) | 29  | (16) | 13 | (7)  | 182 |
| No                                     | 190 | (34) | 148 | (27) | 136 | (24) | 120 | (22) | 108 | (19) | 52 | (9)  | 559 |
| Unknown                                | 26  | (33) | 21  | (27) | 13  | (17) | 14  | (18) | 15  | (19) | 5  | (6)  | 79  |
| <b>Post-event speech</b>               |     |      |     |      |     |      |     |      |     |      |    |      |     |
| Yes                                    | 59  | (42) | 41  | (29) | 18  | (13) | 34  | (24) | 16  | (11) | 11 | (8)  | 141 |
| No                                     | 203 | (34) | 151 | (26) | 148 | (25) | 116 | (20) | 117 | (20) | 55 | (9)  | 590 |
| Unknown                                | 24  | (27) | 29  | (33) | 17  | (19) | 14  | (16) | 19  | (21) | 4  | (5)  | 89  |
